# Supplementary figures and images for: Topographical and mechanical properties of liposome surfaces harboring Na,K-ATPase by means of atomic force microscopy
Source: Royal Society of Chemistry journal article supplement (doi:10.1039/c9sm00040b), 2019-01-01

Supplementary Material

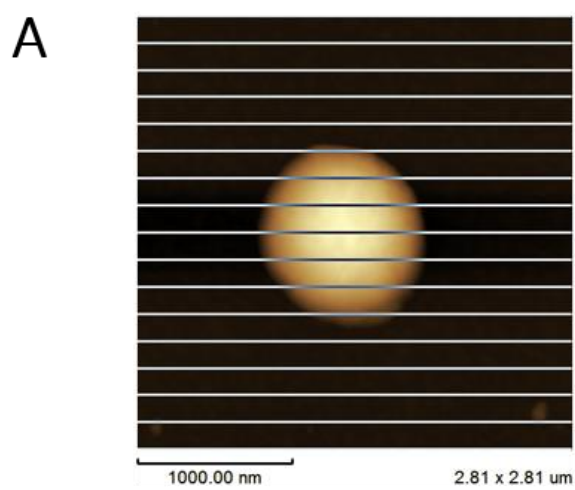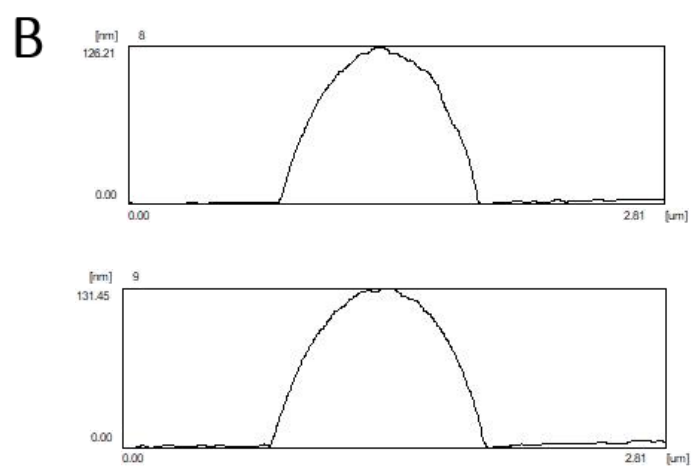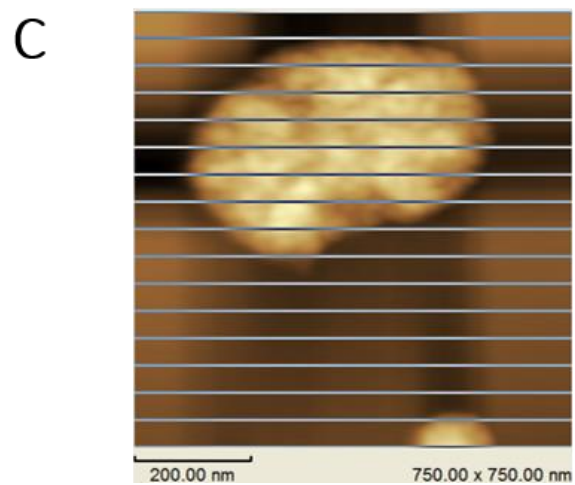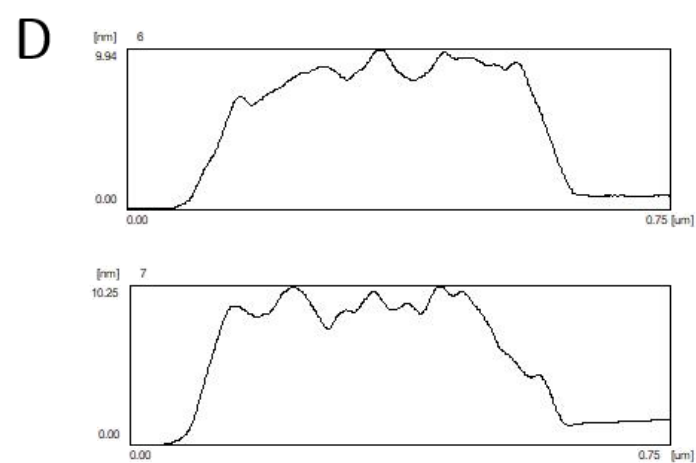

Supplement: c9sm00040b1.pdf [file c9sm00040b1.pdf]
